# Supplementary material for: Synthesis of cross-linked polymers via multi-component Passerini reaction and their application as efficient photocatalysts
Source: Royal Society of Chemistry journal article supplement (doi:10.1039/c4ra02666g), 2014-01-01
Supplement: c4ra02666g1.pdf [file c4ra02666g1.pdf]

## Electronic Supplementary Information

### Synthesis of Cross-Linked Polymers via Multi-Component Passerini Reaction and Their Application As An Efficient Photocatalyst

Wenhai Lin,<sup>ab</sup> Tingting Sun,<sup>ab</sup> Min Zheng,<sup>c</sup> Zhigang Xie,<sup>\*a</sup> Yubin Huang<sup>a</sup> and Xiabin Jing<sup>a</sup>

<sup>a</sup> State Key Laboratory of Polymer Physics and Chemistry, Changchun Institute of Applied Chemistry, Chinese Academy of Sciences, 5625 Renmin Street, Changchun 130022, P. R. China.

<sup>b</sup> University of Chinese Academy of Science, Beijing 10039, P. R. China.

<sup>c</sup> State key of laboratory of Luminescence and Applications, Changchun Institute of Optics, Fine Mechanics and Physics, Chinese Academy of Sciences, 3888 East Nanuhu Road, Changchun, Jilin 130033, P. R. China

#### Content

1. Experimental
2. Figure S1. Nitrogen adsorption-desorption isotherms of Ru-CPs at 77 K.
3. Fig. S2. <sup>1</sup>H NMR of crude mixture for oxidation of thioanisole.
4. Figure S3. <sup>1</sup>H NMR spectrum for oxidation of benzyl amine.

#### 1. EXPERIMENTAL

**Materials.** All reagents were purchased from commercial sources and used without further treatment, unless indicated otherwise.

**Characterizations.** The thermogravimetric analysis (TGA) was performed using a Netzsch Sta 449c thermal analyzer system at the heating rate of 10°C /min in air atmosphere. The FTIR spectra were measured using a Nicolet Impact 410 Fourier transform infrared spectrometer. the Solid-state <sup>13</sup>C NMR spectra were recorded at 5KHz. The nitrogen adsorption isotherm was measured on an Autosorb iQ2 adsorptometer, Quantachrome Instruments. TEM micrographs were recorded using JEM 1011 with an acceleration voltage of 100 kV.

#### Synthesis of Ru-CPs

A mixture of [(bpy)<sub>2</sub>Ru(fmbpy)(PF<sub>6</sub>)<sub>2</sub>] (30mg, 0.033mmol), 1,6-diisocyanohexane

(36.5mg, 1mmol), sebacic acid (202.24mg, 1mmol) and terephthalaldehyde (201.2mg, 1.5mmol) in  $\text{CH}_2\text{Cl}_2$  (1ml) was stirred at room temperature for 4 days. Finally, the reaction mixture was washed with various solvents

### Synthesis of CPs

A mixture of 1,6-diisocyanohexane (136.5 mg, 1 mmol), sebacic acid (202.24mg, 1mmol) and terephthalaldehyde (201.2mg, 1.5mmol) in  $\text{CH}_2\text{Cl}_2$  (1ml) was stirred at room temperature for 4 days. Finally, the reaction mixture was washed with various solvents and then dried under vacuum overnight.

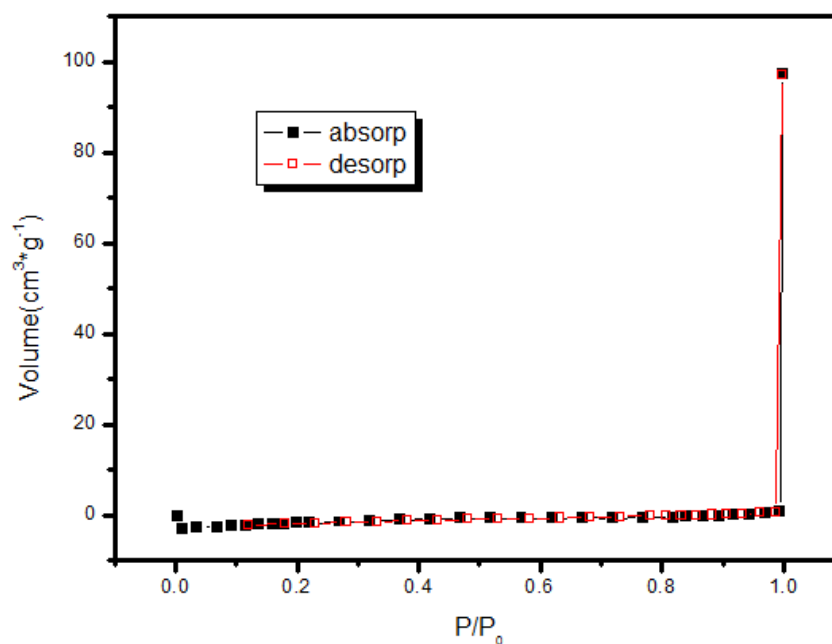

Figure S1. Nitrogen adsorption-desorption isotherms of Ru-CPs at 77 K.

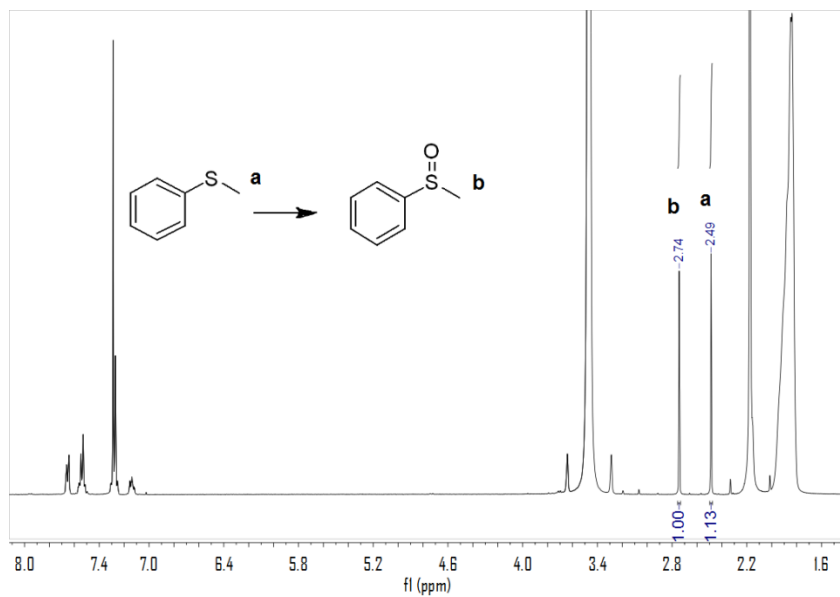

Fig. S2. <sup>1</sup>H NMR of crude mixture for oxidation of thioanisole.

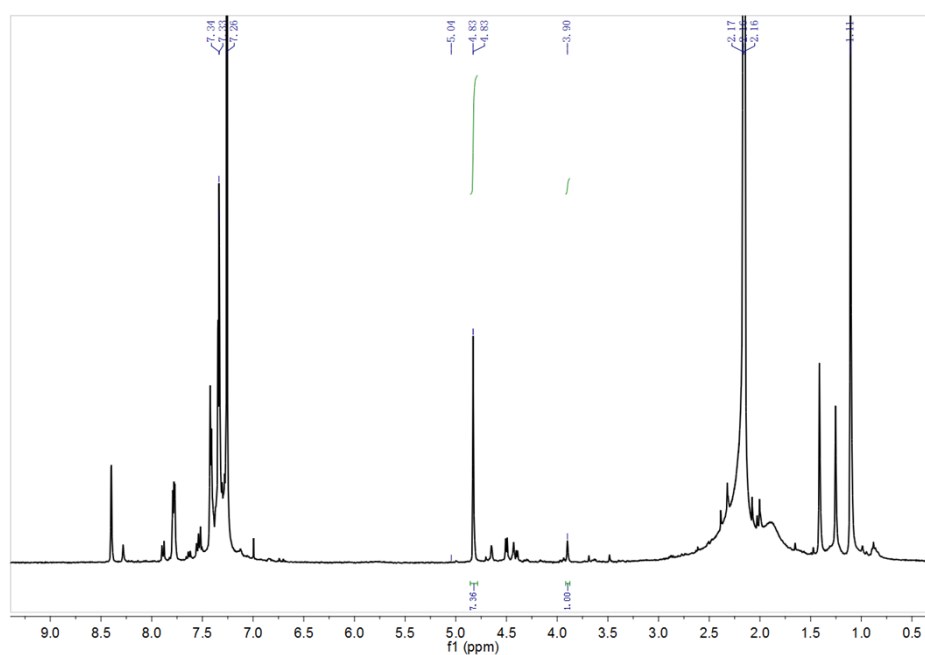

Figure S3. <sup>1</sup>H NMR spectrum for oxidation of benzyl amine. The substrate peak at 3.90 ppm and the product peak at 4.83 ppm were used to calculate the conversion.
